1  
2  
3  
4  
5  
6  
7  
8  
9  
10  
11  
12  
13  
14  
15  
16  
17  
18  
19  
20  
21  
22  
23

## **Origin of imported SARS-CoV-2 strains in The Gambia identified from whole genome sequences.**

Abdoulie Kanteh<sup>1</sup>, Jarra Manneh<sup>1</sup>, Sona Jabang<sup>1</sup>, Mariama A. Kujabi<sup>1</sup>, Bakary Sanyang<sup>1</sup>, Mary A. Oboh<sup>2</sup>, Abdoulie Bojang<sup>2</sup>, Haruna S. Jallow<sup>5</sup>, Davis Nwakanma<sup>3</sup>, Ousman Secka<sup>3</sup>, Anna Roca<sup>2</sup>, Alfred Amambua-Ngwa<sup>2</sup>, Martin Antonio<sup>4</sup>, Ignatius Baldeh<sup>5</sup>, Karen Forrest<sup>6</sup>, Ahmadou Lamin Samateh<sup>7</sup>, Umberto D'Alessandro<sup>2\*</sup>, Abdul Karim Sesay<sup>1\*</sup>

<sup>1</sup>Genomics Core Facility, Lab services, MRCG at LSHTM, Fajara, The Gambia

<sup>2</sup>Disease Control and Elimination, MRCG at LSHTM, Fajara, The Gambia

<sup>3</sup>Laboratory Services, MRCG at LSHTM, Fajara, The Gambia

<sup>4</sup>West Africa Platform, MRCG at LSHTM, Fajara, The Gambia

<sup>5</sup>National Public Health, Laboratories, Kotu, The Gambia

<sup>6</sup>Clinical Service Department, MRCG at LSHTM, Fajara, The Gambia

<sup>7</sup>Ministry of Health, Banjul, The Gambia

\*Corresponding authors

E-mail: [Abdul.Sesay@lshtm.ac.uk](mailto:Abdul.Sesay@lshtm.ac.uk) (AKS and U D'A are Joint Senior Authors)

## 24 **Abstract**

25 Severe Acute Respiratory Syndrome Coronavirus 2 (SARS-CoV-2) is a positive-sense  
26 single stranded RNA virus with high human transmissibility. This study generated  
27 Whole Genome data to determine the origin and pattern of transmission of SARS-  
28 CoV-2 from the first six cases tested in The Gambia. Total RNA from SARS-CoV-2  
29 was extracted from inactivated nasopharyngeal-oropharyngeal swabs of six cases and  
30 converted to cDNA following the ARTIC COVID-19 sequencing protocol. Libraries  
31 were constructed with the NEBNext ultra II DNA library prep kit for Illumina and Oxford  
32 Nanopore Ligation sequencing kit and sequenced on Illumina MiSeq and Nanopore  
33 GridION, respectively. Sequencing reads were mapped to the Wuhan reference  
34 genome and compared to eleven other SARS-CoV-2 strains of Asian, European and  
35 American origins. A phylogenetic tree was constructed with the consensus genomes  
36 for local and non-African strains. Three of the Gambian strains had a European origin  
37 (UK and Spain), two strains were of Asian origin (Japan). In The Gambia, Nanopore  
38 and Illumina sequencers were successfully used to identify the sources of SARS-CoV-  
39 2 infection in COVID-19 cases.

40 **Keywords:** Coronavirus, SARS-CoV-2, nasopharyngeal-oropharyngeal, RNA,  
41 genome, Nanopore, Illumina, sequencing, ARTIC protocol.

42

## 43 **Introduction**

44 The emerging and re-emerging of pathogens such as severe acute respiratory  
45 syndrome-coronavirus 2 (SARS-CoV-2) pose a grave threat to human health.<sup>1</sup> The  
46 SARS-CoV-2 disease, first detected in Wuhan, China, in December 2019 has become  
47 a global pandemic,<sup>2</sup> and is causing an unprecedented burden on the health care

48 systems and economies globally.<sup>3-6</sup> Worldwide, the number of cases has been  
49 increasing exponentially,<sup>6</sup> especially in Europe and America, with significant but  
50 variable case-fatality rates between continents. By April 28<sup>th</sup>, 2020, there were more  
51 than 3.1 million SARS-CoV-2 confirmed cases and more than 200,000 deaths.<sup>7</sup>  
52 Nevertheless, SARS-CoV-2 confirmed cases in sub-Saharan Africa are currently  
53 relatively low, possibly due to much lower international air traffic than in other  
54 continents and thus a low number of imported cases.<sup>8</sup> By the 28<sup>th</sup> April 2020, The  
55 Gambia, a tourism hotspot, had reported a total of ten SARS-CoV-2 cases, including  
56 one death. While the travel history of index cases may suggest the origin of infection,  
57 phylogenetic analysis of the strains isolated from these cases and contacts will provide  
58 a precise link between local transmission and other global populations.

59 The first SARS-CoV-2 case was reported to be an acquired zoonotic infection,<sup>9,10</sup>  
60 followed by efficient and rapid human-to-human transmission from Wuhan, China, to  
61 other Asian countries and then other continents.<sup>11-13</sup> The single stranded positive  
62 sense RNA genome of the SARS-CoV-2 is closely related to the Middle East  
63 Respiratory Syndrome-Coronavirus (MERS-CoV) and the Severe Acute Respiratory  
64 Syndrome Coronavirus (SARS-CoV).<sup>9-14</sup> These pathogens pose significant risk to  
65 global health and modern-day life, hence the need for effective strategies to detect the  
66 sources of infections, outbreaks and transmission patterns in different geographical  
67 settings.

68 The phylogenetic analyses of global SARS-CoV-2 sequences provide insight into the  
69 relatedness of strains from different areas and suggest the transmission of four super-  
70 clades,<sup>15</sup> geographically clustering into viral isolates from Asia (China), US (two super  
71 clades) and Europe. The objective of this analysis was to provide genome data on six

72 cases of SARS-CoV-2 in The Gambia, determine the source of these strains, baseline  
73 for subsequent local transmission, and contribute genomic diversity data towards local  
74 and global vaccine design. The Oxford Nanopore GridION and Illumina MiSeq  
75 platforms were utilized to sequence the viral genomes from four confirmed SARS-  
76 CoV-2, one inconclusive and one negative case by rRT-PCR. We also analysed the  
77 genomes of samples classified as indeterminate and negative by RT-PCR (COVID-19  
78 detection assay) from two different cases respectively.

## 79 **Methods**

### 80 **Sample acquisition**

81 Nasopharyngeal-Oropharyngeal (NP-OP) swabs (451) from SARS-CoV-2 suspected  
82 cases and their contacts were transported to the Medical Research Council Unit The  
83 Gambia at London School of Hygiene and Tropical Medicine (MRCG at LSHTM). Of  
84 the 451 samples screened by rRT-PCR, ten were confirmed as SARS-CoV-2 cases  
85 and 5 as indeterminate cases (positive for the screening gene and negative for the  
86 SARS-CoV-2 confirmatory gene)

87

88 For WGS, four SARS-CoV-2 confirmed cases, one indeterminate case and one  
89 negative case were processed Table 1. In one of the confirmed cases, different  
90 isolates from samples collected up to 10 days apart were sequenced. Of the 6 cases  
91 sequenced, 4 were male; 2 females, there was one death, two recoveries and two  
92 active cases.

93

94 **Table 1: Sample information for COVID-19 sequenced cases from The Gambia**

95

| Case ID                                                  | Travelled from | Date Reported | Current Status | Number of samples submitted | Time points   | Library prep type |                      |                              | Sequencing       |                    |
|----------------------------------------------------------|----------------|---------------|----------------|-----------------------------|---------------|-------------------|----------------------|------------------------------|------------------|--------------------|
|                                                          |                |               |                |                             |               | Depletion         | ARTIC amplicon (NEB) | ARTIC amplicon (ONT -LSK109) | Illumina (MiSeq) | Nanopore (GridION) |
| A                                                        | London         | 16/03/20      | Recovered      | 4                           | Days 0,4,7,10 | 2                 | 4                    | 4                            | 4                | 4                  |
| B                                                        | Bangladesh     | 19/03/20      | Dead           | 1                           | Day 0         | 0                 | 1                    | 1                            | 1                | 1                  |
| C                                                        | France         | 20/03/20      | Recovered      | 1                           | Day 0,        | 0                 | 1                    | 1                            | 1                | 1                  |
| D                                                        | France         | 26/03/20      | Active         | 2                           | Day 0,11      | 0                 | 1                    | 2                            | 1                | 2                  |
| E                                                        | Netherland     | 23/03/20      | Active         | 2                           | Day 0,14      | 0                 | 1                    | 2                            | 1                | 2                  |
| F                                                        | Italy          | 13/03/20      | Recovered      | 1                           | Day 0         | 0                 | 1                    | 1                            | 1                | 1                  |
| <b>Total</b>                                             |                |               |                | <b>11</b>                   |               | <b>2</b>          | <b>9</b>             | <b>11</b>                    | <b>9</b>         | <b>11</b>          |
| Cases A-D = Confirmed RT-PCR COVID-19 cases              |                |               |                |                             |               |                   |                      |                              |                  |                    |
| Case E = Indeterminate by RT-PCR                         |                |               |                |                             |               |                   |                      |                              |                  |                    |
| Case F = RT-PCR COVID-19 negative                        |                |               |                |                             |               |                   |                      |                              |                  |                    |
| Cases A and D travelled to The Gambia in the same flight |                |               |                |                             |               |                   |                      |                              |                  |                    |
| Cases C and D both travelled from France                 |                |               |                |                             |               |                   |                      |                              |                  |                    |

## 101 **RNA extraction**

102

103 Total RNA was purified from eleven samples Table 1 using the QiaAmp viral RNA mini  
104 kit (Qiagen – 52906) following viral inactivation at the MRCG at LSHTM containment  
105 level 3 facility. The purified RNA samples were quantified using Qubit RNA reagent kit  
106 on a Qubit fluorometer 3.0 (concentration range 3-7 ng/μl) (Invitrogen). RNA integrity  
107 (RINe) was checked on the Agilent TapeStation  
108 4200 yielding a RINe range of 2.1–5.

109

110

## 111 **Ribosomal RNA depletion, cDNA synthesis and Multiplex**

### 112 **PCR**

113 Two of the samples (day 0 and 4) from Case A were depleted using the RiboMinus  
114 transcription isolation kit from ThermoFisher and purified using RNA purification beads  
115 from Beckman Coulter. The purified rRNA-depleted samples were converted to cDNA  
116 as per the NEBNext ultra II RNA library prep kit for Illumina (NEB, E7770L). Total RNA  
117 from the rest of the samples was converted to cDNA according to the ARTIC amplicon  
118 sequencing protocol for SARS-CoV-2.<sup>artic</sup> ARTIC protocol primer <sup>artic</sup> schemes for  
119 SARS-CoV-2 (Version 2) were used for the multiplex PCR. Two primer pools at 10 μM  
120 containing 98 primers each were used for the PCR amplification. The samples were  
121 subjected to 35 cycles of PCR. The purified products were visualised and quantified.

122

## 123 **Illumina and Nanopore library Preparation and Sequencing**

124

## 125 **Illumina and Nanopore library preparation**

126 The purified cDNA from the depletion and PCR products from the ARTIC protocol were  
127 normalised to 100 ng with EB buffer (10 mM Tris-HCl) to a final volume of 25 µl for  
128 Illumina library preparation using the NEBNext ultra II DNA library prep kit for Illumina  
129 (New England Biolabs, UK; E7645). Following 7 cycles of PCR enrichment, the  
130 libraries were purified and quantified using the high sensitivity dsDNA Qubit kit and  
131 sized using D1000 ScreenTape on the Agilent TapeStation 4200 (amplicon size range  
132 519-572 bp). Each sample was normalised to 10 nM before pooling. The pool was run  
133 at a final concentration of 10 pM on an Illumina MiSeq instrument using MiSeq V3  
134 reagent kit. The pool was denatured with sodium hydroxide according to Illumina  
135 recommendation and spiked with 5% PhiX (PhiX control v3 Illumina Catalogue FC-  
136 110-3001) before loading (Fig 1).

137

138 Nanopore sequencing library preparation was performed according to the  
139 manufacturer's instructions for the Ligation Sequencing Kit (SQK-LSK109, Oxford  
140 Nanopore Technologies). Briefly, the cDNA samples were amplified using the ARTIC  
141 protocol and purified with 1X AMPure XP beads. Individual samples were then  
142 subjected to end repair and adapter ligation following SQK-LSK109 protocol. 20 ng of  
143 each library was loaded on the Oxford Nanopore GridION on individual R9.4.1 flow  
144 cells and sequencing data monitored on the fly using Rampart (v1.1.0). Fig 1  
145 summarised the steps involved in sequencing using for both Nanopore and Illumina  
146 platform.

147

148 **Fig 1. Summary of the Library preparation steps for Illumina and Oxford**  
149 **Nanopore Sequencing Technology platforms. Library preparation took ~ 8 hours**  
150 **for the Nanopore workflow and ~10 hours for the Illumina workflow.**

151  
152

## 153 **Quality control and read mapping for Illumina and Nanopore** 154 **platform**

155 Although a minimum read depth of 30X for the SARS-CoV-2 genome was targeted,  
156 more than 100X coverage was generated on both platforms. FASTQ files were  
157 subjected to various quality control checks and analysed following standard analysis  
158 pipelines (SARS-CoV-2 novel Coronavirus bioinformatics protocol; SAMTOOLS).

159 For Nanopore data, sequencing reads were quality checked using MinIONQC,<sup>16</sup> and  
160 only reads with a minimum Q score of 7 were included in our subsequent analysis.  
161 Quality checked reads were run through what's in My Pot (WIMP) pipeline on the  
162 Oxford Nanopore EPI2ME platform to verify the number of reads characterised as  
163 SARS-CoV-2.

164 We used SARS-CoV-2 novel Coronavirus bioinformatics protocol developed by Nick  
165 Loman *et. al.* to analyse the Nanopore data.<sup>17</sup> Firstly, we used "ARTIC Guppyplex" to  
166 remove chimeric reads from each sample with the following parameters (--min-length  
167 400 --max-length 700). Filtered reads were then mapped to Wuhan-Hu-1 reference  
168 genomes (accession number MN908947.3) and Single nucleotide polymorphism  
169 (SNPs) were generated based on the reference and a consensus genome for each



170 sample was generated using SAMTOOLS (v1.9). To further validate our results, we  
171 ran all genomes through the coronavirus typing tool (v1.13).

172 Similarly, 250 bp paired end Illumina reads were quality checked using FASTQC  
173 (v0.11.5).<sup>18</sup> Reads with only a minimum Phred score of 30 were included in our  
174 downstream analysis. One sample which was SARS-CoV-2 negative by reverse-  
175 transcription real-time polymerase chain reaction (rRT-PCR) was characterised as Bat  
176 coronavirus using kraken and thus excluded from the analysis. Filtered reads were  
177 then mapped to the Wuhan-Hu-1 reference genomes (accession number  
178 MN908947.3) using BWA-mem (0.7.17-r1188). BCFtools Mpileup (v1.8) was used in  
179 creating a variant file. Finally, BCFtools consensus was used in generating the FASTA  
180 consensus sequence for each sample.

## 181 **Phylogenetic analysis for Illumina and Nanopore platform**

182 Prank (v140603) was used to generate a multiple alignment of all the samples  
183 including some available reference genomes around the globe (Downloaded from  
184 RefSeq). These strains were selected based on the patients' travel history and the  
185 major geographical spread of the pandemic. We finally constructed a maximum  
186 likelihood phylogenetic tree using the General time reversible model (GTR) with  
187 IQTREE (v1.3.11.1). The Interactive Tree of Life (ITOL) (v5) was used to visualise and  
188 annotate the phylogenetic tree.

## 189 **Results and Discussion**

190 Whole genome sequencing data was generated from six confirmed cases from both  
191 sequencing platforms; the additional time points from cases D and E were sequenced

192 only on the Nanopore GridION (Table 2). Two samples from the first case were  
 193 sequenced on both platforms following ribosomal depletion, the results generated (not  
 194 included) showed depletion of human sequences and the majority of the reads  
 195 mapped to bacterial sequences with only 0.03% from the Illumina reads mapping to  
 196 the SARS-CoV-2 reference strain. The rRT-PCR and the sequencing data generated  
 197 are summarized in Table 2.

198 **Table 2: Summary of COVID-19 results**

| Case ID  | Time point    | Diagnostic results Covid-19 (Ct) |               | Sequencing results Covid-19 |          | Phylogenetic Inferences |
|----------|---------------|----------------------------------|---------------|-----------------------------|----------|-------------------------|
|          |               | Gene 1 (E gene)                  | Gene 2 (RdRP) | Illumina                    | Nanopore | Illumina & Nanopore     |
| <b>A</b> | <b>Day 0</b>  | +                                | +             | +                           | +        | <b>Europe (UK)</b>      |
|          | <b>Day 4</b>  | +                                | +             | +                           |          |                         |
|          | <b>Day 7</b>  | +                                | +             | +                           |          |                         |
|          | <b>Day 10</b> | +                                | +             | +                           |          |                         |
| <b>B</b> | <b>Day 0</b>  | +                                | +             | +                           |          | <b>Asia (Japan)</b>     |
| <b>C</b> | <b>Day 0</b>  | +                                | +             | +                           |          | <b>Europe (Spain)</b>   |
| <b>D</b> | <b>Day 0</b>  | +                                | +             | +                           |          | <b>Europe (Spain)</b>   |
|          | <b>Day 11</b> | +                                | +             | <i>Not sequenced</i>        |          |                         |
| <b>E</b> | <b>Day 0</b>  | +                                | -             | +                           |          | <b>Asia (Japan)</b>     |
|          | <b>Day 14</b> | +                                | -             | <i>Not sequenced</i>        |          |                         |
| <b>F</b> | <b>Day 0</b>  | -                                | -             | -                           | -        |                         |

199

200 From the Illumina platform, a high quality read length of 250 bp paired-end reads was  
 201 generated for each sample after 48 hrs post library preparation. Total number of  
 202 sequences ranged from three to six million reads with an average mapping quality of  
 203 60 when mapped to the Wuhan reference genome. The Nanopore platform generated  
 204 a read length of 400 - 17000 bp for each sample after 12 hrs of sequencing. It recorded

205 a range of one to four million reads with average mapping quality of 58 across the  
206 reference genome for each sample. To compare the results from both technologies,  
207 consensus genomes were generated for each sample and a maximum likelihood  
208 phylogenetic tree was constructed. Both platforms showed a similar topology with  
209 1000 bootstrap clustering The Gambian isolates with the European and Asian strains  
210 as illustrated in Figs 2 and 3.

211 **Figure 2. A maximum likelihood phylogenetic tree of ten SARS-CoV-2 genomes**  
212 **isolated from The Gambia (Nanopore data) and 11 SARS-CoV-2 strains isolated**  
213 **in different parts of the world. The tree showed the genetic relation of strains**  
214 **isolated in The Gambian to the global circulating strains.**

215

216

217 **Figure 3. A maximum likelihood phylogenetic tree of eight SARS-CoV-2**  
218 **genomes isolated from The Gambia (Illumina data) and 11 SARS-CoV-2 strains**  
219 **isolated in different parts of the world. The tree showed the genetic relation of**  
220 **strains isolated in The Gambian to the global circulating strains.**

221 Six genomes (4 samples from Case A, 1 from case D and 1 from case C) from the  
222 Gambian samples clustered with the European (Spanish and United Kingdom) SARS-  
223 CoV-2 strains. This is not surprising given that these patients had been in Europe  
224 before arriving in The Gambia. Although viruses are known to mutate and change  
225 rapidly,<sup>19,20</sup> the viral genome of case A clustered on the same node at different time  
226 points indicating the patient was shedding the same virus with no observed  
227 polymorphism according to Nanopore results. Interestingly, the same samples

228 sequenced on the MiSeq suggested polymorphism at day 10, resulting in a longer  
229 branch length compared to previous time points (Figure 3). Further analysis of the  
230 Illumina data showed seven more SNPs in the day 10 sample compared to the other  
231 time points. The SNP winked by the Nanopore phylogenetically, might have an  
232 associated higher error rate compared to the Illumina. Strains from cases C and D,  
233 both having travelled from France, were more closely related to the Spanish strain  
234 included for comparison. Though cases D and A travelled to The Gambia on the same  
235 flight, their strains had a different origin, indicating that they could have been infected  
236 independently, before the start of their journeys.

237 The viral genome from case B who initiated travel from Bangladesh and then across  
238 four other countries, including Senegal, before arriving in The Gambia, clustered with  
239 a strain from Japan. This case may have contracted the infection in Asia and his travel  
240 history suggests he could have contributed to infections in other countries. The two  
241 isolates from case E at different time points clustered with strains from Japan as well.  
242 Interestingly, case E samples were indeterminate by rRT-PCR diagnostics, even  
243 though the outcome from multiple alignment showed no mismatch between the  
244 sequences and the primer set. The indeterminate diagnostic rRT-PCR result could be  
245 due to low sensitivity of the assay, an indication of low viral density of SARS-CoV-2 in  
246 the sample. Therefore, subsequent follow up for such cases is essential to further  
247 evaluate diagnosis and aid towards the understanding of the disease progression and  
248 the evolution of this novel virus strain under different case management environments.

249 Although WGS data is still limited in sub-Saharan Africa, this approach has proven to  
250 be a highly sensitive, specific and confirmatory tool for SARS-CoV-2 detection. Hence,  
251 the use of second and third generation sequencing technologies coupled with

252 bioinformatics is quite imperative in providing data for monitoring transmission  
253 dynamics.

254 From the two sequencing platforms, we were able to rapidly generate sequencing data  
255 in 20 hours and 3 days after sample reception on the Nanopore and Illumina platforms  
256 respectively. While Illumina sequencing may be more accurate in determining within-  
257 sample-diversity, Nanopore data can help with the understanding of the linkage  
258 between SNPs within individual virions. The Nanopore platform with its flexibility for  
259 number of samples per run, and the generation of data in real-time and at a reasonable  
260 cost makes it most suitable for outbreaks. Therefore, with our optimised and ready-to-  
261 go workflow, we are set to generate data for tracking SARS-CoV-2 in The Gambia and  
262 other African countries within 24 hours of sample reception. This would go a long way  
263 in providing knowledge on the molecular epidemiology of this disease, give the true  
264 burden of the disease in this setting (as seen in the resolution of the indeterminate  
265 cases) as well as provide information for African specific vaccine development and  
266 inform policy makers on decisions for strategic control measures.

## 267 **Conclusion**

268 We have demonstrated that the Nanopore platform with the flexibility of high-end  
269 desktop sequencer (GridION) to the portable sequencer (MinION) in combination with  
270 the ARTIC protocol and workflow allows for cost-effective (wide range for the number  
271 of runs and samples per flow cell), and near real-time generation of pathogen  
272 sequence data. Our analysis has shown that the SARS-CoV-2 strains identified in The  
273 Gambia are of European and Asian origin and sequenced data matched patients'

274 travel history. In addition, we were able to show that two COVID19 positive cases  
275 travelling in the same flight had in fact different sources of infection.

276

## 277 **Acknowledgment**

278

279 We acknowledge the use of CLIMB server for the cloud-based analysis, the field  
280 sample collection by the teams at Ministry of Health, Epidemiology Department,  
281 Thushan de Silva for helpful discussion on ARTIC protocol and sequencing, Covid-19  
282 laboratory diagnostic staff, and at MRCG at LSHTM Logistics, Staff at CSD, COVID-  
283 19 Emergency Management.

284

## 285 **Authors contribution**

286 AK lead with Nanopore platform and the bioinformatics analysis, JM lead with Illumina  
287 platform, MAK lead with viral Inactivation and purification. AK, JM, MAK, SJ, BS, MAO  
288 & AB contributed to the sequencing pipeline and writing of the manuscript.

289

## 290 **Competing Interests**

291 The authors declare that they have no competing interests.

292

293 The Genomic Core facility at MRCG at LSHTM is the one and only certified service  
294 provider for the ONT GridION platform in Africa.

295

296 Ethics statement:

297 The study has under gone under MRCG at LSTM and Gambia Government joint ethics  
298 committee for review.

299

## 300 **Data and Materials Availability**

301 The details of methods used in the paper is available as a supplementary document.

302 GISAID submission number: EPI\_ISL\_428856 and EPI\_ISL\_428857

303 The data from the genomes sequenced in the Gambia were submitted and available  
304 in Nextstrain website for real-time tracking of the pathogen evolution.

305

306

## 307 **References:**

- 308 1. Zhu N, Zhang D, Wang W, Li X, Yang B, Song J, et al. A novel coronavirus  
309 from patients with pneumonia in China, 2019. *N Engl J Med.* 2020;382(8):727–  
310 33.
- 311 2. WHO Director-General’s opening remarks at the media briefing on COVID-19 -  
312 11 March 2020 [Internet]. [cited 2020 May 7]. Available from:  
313 [https://www.who.int/dg/speeches/detail/who-director-general-s-opening-  
314 remarks-at-the-media-briefing-on-covid-19---11-march-2020](https://www.who.int/dg/speeches/detail/who-director-general-s-opening-remarks-at-the-media-briefing-on-covid-19---11-march-2020)
- 315 3. Covid- I, States U, States U. Forecasting COVID-19 impact on hospital bed-  
316 days , ICU-days , ventilator- days and deaths by US state in the next 4 months  
317 Key Points. 114.
- 318 4. Craven M, Singhal S, Wilson M. COVID-19 : Briefing note ,. McKinsey &  
319 Company. 2020;(April).

- 320 5. A world of hurt: how pandemics such as COVID-19 affect the global economy |  
321 World Finance [Internet]. [cited 2020 May 7]. Available from:  
322 [https://www.worldfinance.com/strategy/a-world-of-hurt-how-pandemics-such-](https://www.worldfinance.com/strategy/a-world-of-hurt-how-pandemics-such-as-covid-19-affect-the-global-economy)  
323 [as-covid-19-affect-the-global-economy](https://www.worldfinance.com/strategy/a-world-of-hurt-how-pandemics-such-as-covid-19-affect-the-global-economy)
- 324 6. Remuzzi A, Remuzzi G. Health Policy COVID-19 and Italy : what next ? Lancet  
325 [Internet]. 2020;395(10231):1225–8. Available from:  
326 [http://dx.doi.org/10.1016/S0140-6736\(20\)30627-9](http://dx.doi.org/10.1016/S0140-6736(20)30627-9)
- 327 7. Coronavirus Live Tracker [Internet]. [cited 2020 May 7]. Available from:  
328 <http://corona.tuply.co.za/>
- 329 8. Martinez-alvarez M, Jarde A, Usuf E, Brotherton H, Bittaye M, Samateh AL, et  
330 al. Comment COVID-19 pandemic in west Africa. Lancet Glob Heal [Internet].  
331 2020;8(5):e631–2. Available from: [http://dx.doi.org/10.1016/S2214-](http://dx.doi.org/10.1016/S2214-109X(20)30123-6)  
332 [109X\(20\)30123-6](http://dx.doi.org/10.1016/S2214-109X(20)30123-6)
- 333 9. Lu R, Zhao X, Li J, Niu P, Yang B, Wu H, et al. Articles Genomic  
334 characterisation and epidemiology of 2019 novel coronavirus : implications for  
335 virus origins and receptor binding. Lancet [Internet]. 2020;395(10224):565–74.  
336 Available from: [http://dx.doi.org/10.1016/S0140-6736\(20\)30251-8](http://dx.doi.org/10.1016/S0140-6736(20)30251-8)
- 337 10. Ye Z, Yuan S, Yuen K, Fung S, Chan C, Jin D. Zoonotic origins of human  
338 coronaviruses. 2020;16:6–8.
- 339 11. Nishiura H, Jung S, Linton NM, Kinoshita R, Yang Y, Hayashi K, et al. The  
340 Extent of Transmission of Novel Coronavirus in. 2020;(January).
- 341 12. Yuan J, Li M, Lv G, Lu ZK. International Journal of Infectious Diseases  
342 Monitoring transmissibility and mortality of COVID-19 in Europe. Int J Infect Dis  
343 [Internet]. 2020;95:311–5. Available from:  
344 <https://doi.org/10.1016/j.ijid.2020.03.050>



- 345 13. Ghinai I, Mcpherson TD, Hunter JC, Kirking HL, Christiansen D, Joshi K, et al.  
346 First known person-to-person transmission of severe acute respiratory  
347 syndrome coronavirus 2 ( SARS-CoV-2 ) in the USA. 2(Cdc):1137–44.
- 348 14. Chan JF, Kok K. Genomic characterization of the 2019 novel human-  
349 pathogenic coronavirus isolated from a patient with atypical pneumonia after  
350 visiting Wuhan. 2020;9.
- 351 15. Chiara M, Horner DS, Pesole G. Comparative genomics suggests limited  
352 variability and similar evolutionary patterns between major clades of SARS-  
353 Cov-2. 2020;
- 354 16. Lanfear R, Schalamun M, Kainer D, Wang W, Schwessinger B. Sequence  
355 analysis MinIONQC : fast and simple quality control for MinION sequencing  
356 data. 2019;35(July 2018):523–5.
- 357 17. Artic Network [Internet]. [cited 2020 May 7]. Available from:  
358 <https://artic.network/ncov-2019/ncov2019-bioinformatics-sop.html>
- 359 18. Babraham Bioinformatics - FastQC A Quality Control tool for High Throughput  
360 Sequence Data [Internet]. [cited 2020 May 7]. Available from:  
361 <http://www.bioinformatics.babraham.ac.uk/projects/fastqc/>
- 362 19. Duffy S. Why are RNA virus mutation rates so damn high? PLOS Biol  
363 [Internet]. 2018 Aug 13;16(8):e3000003. Available from:  
364 <https://doi.org/10.1371/journal.pbio.3000003>
- 365 20. Zhao Z, Li H, Wu X, Zhong Y, Zhang K, Zhang Y, et al. implications. 2004;9:1–  
366 9.
- 367
- 368
- 369



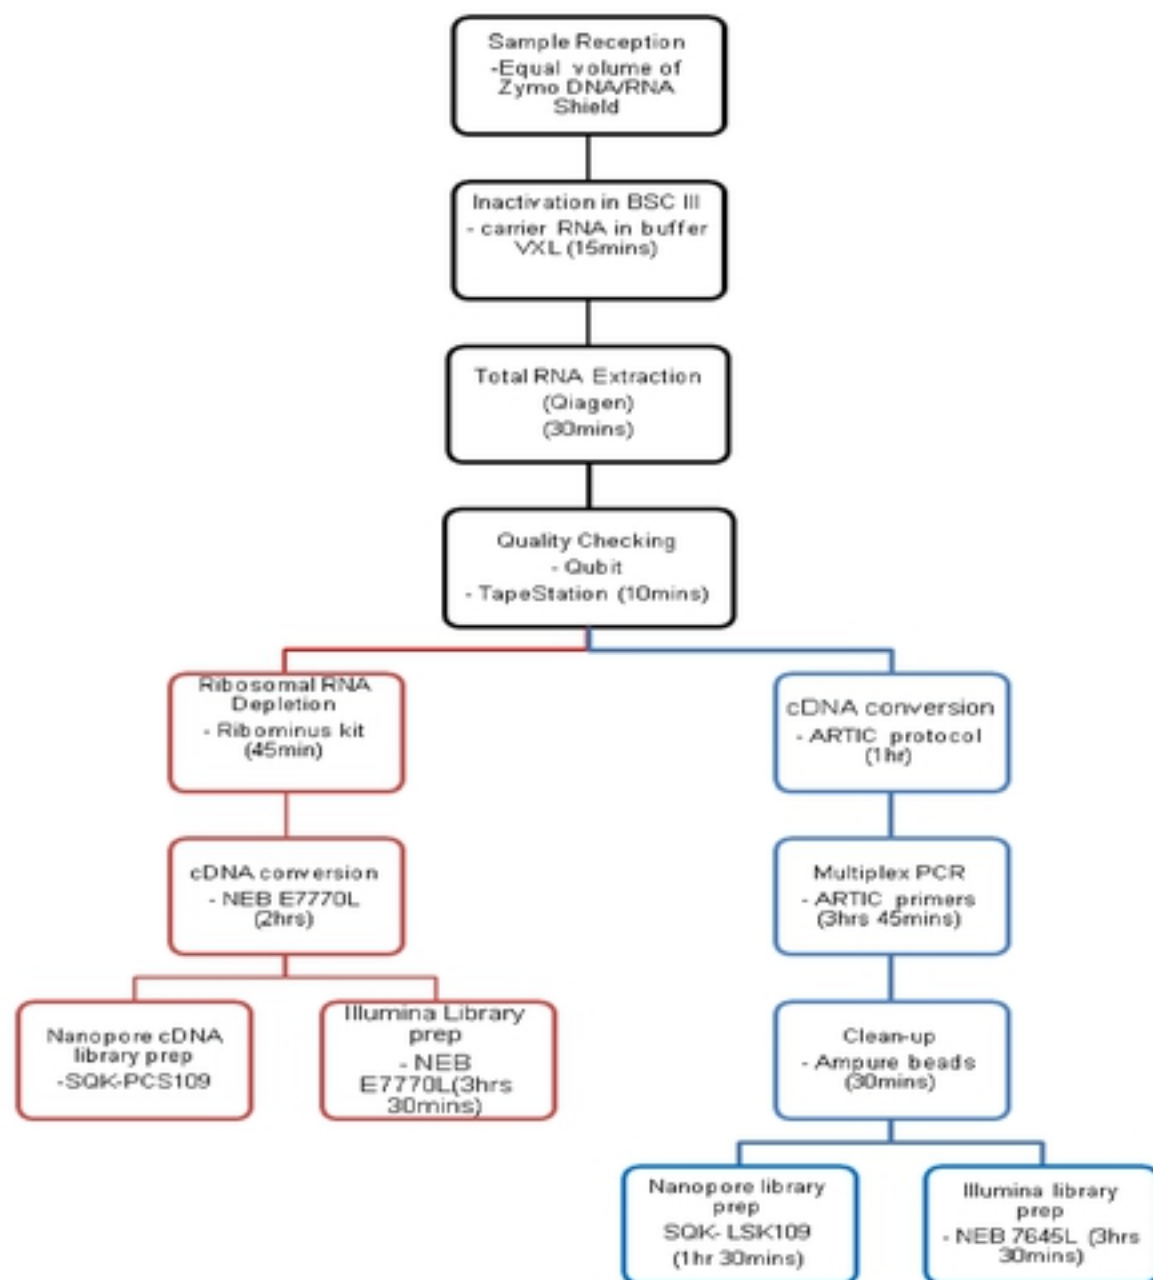

**Figure 1:** Summary of the Library preparation steps for Illumina and Oxford Nanopore Sequencing Technology platforms. Library preparation took ~ 8 hours for the Nanopore workflow and ~10 hours for the Illumina workflow.

Tree scale: 0.0001

**Strain**  
★ Gambia  
● Ref genomes

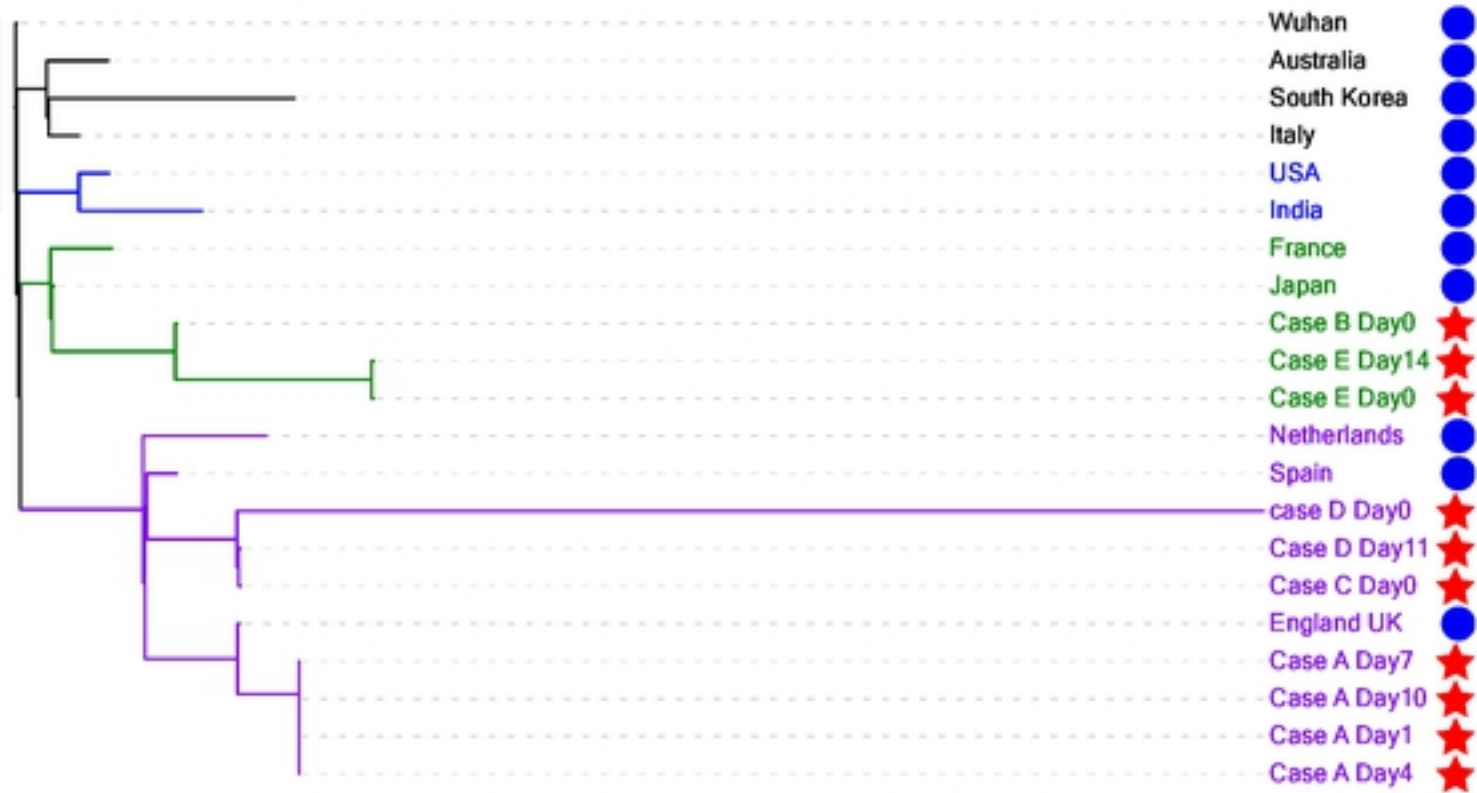

Figure 2. A maximum likelihood phylogenetic tree of ten SARS-CoV-2 genomes isolated from The Gambia (Nanopore data) and 11 SARS-CoV-2 strains isolated in different parts of the world. The tree showed the genetic relation of strains isolated in The Gambian to the global circulating strains.

Tree scale: 0.0001

Strain  
★ Gambia  
● Ref genomes

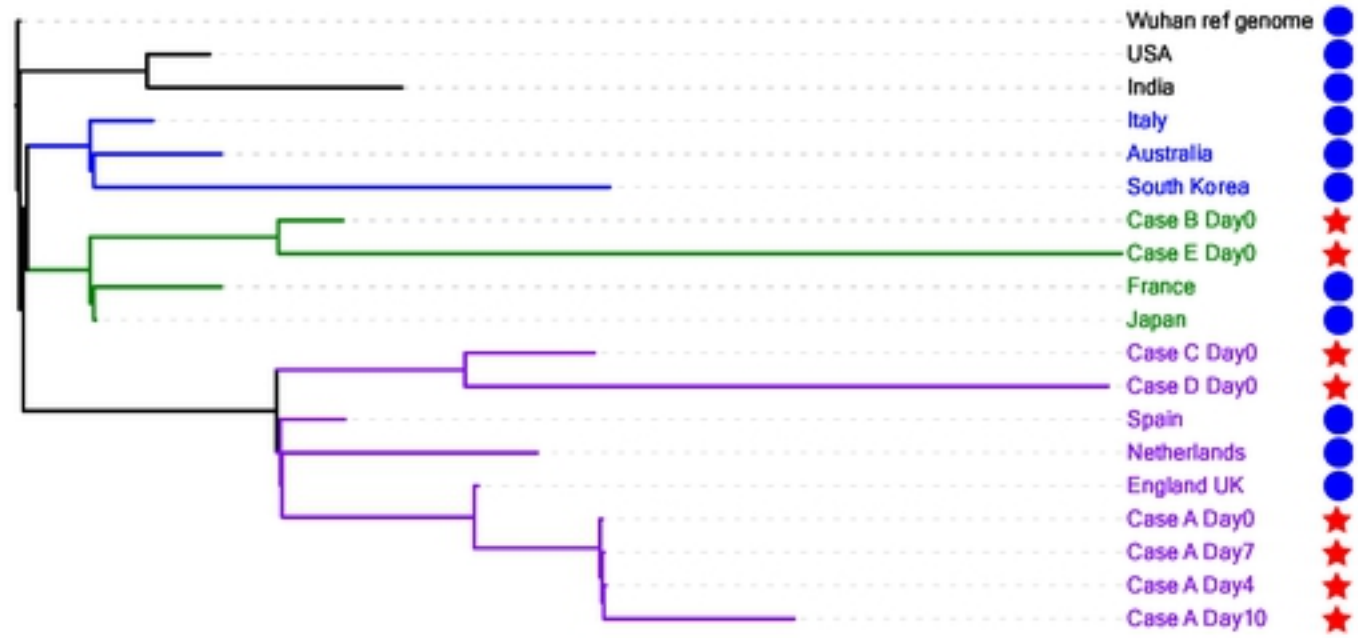

**Figure 3. A maximum likelihood phylogenetic tree of eight SARS-CoV-2 genomes isolated from The Gambia (Illumina data) and 11 SARS-CoV-2 strains isolated in different parts of the world. The tree showed the genetic relation of strains isolated in The Gambian to the global circulating strains.**
